# Supplementary material for: Insulin-like Growth Factor 1 Promotes Cell Proliferation by Downregulation of G-Protein-Coupled Receptor 17 Expression via PI3K/Akt/FoxO1 Signaling in SK-N-SH Cells
Source: Int J Mol Sci. 2022 Jan 28;23(3):1513. doi: 10.3390/ijms23031513 (PMC8835821; doi:10.3390/ijms23031513)
Supplement: Supplementary file 1 [file ijms-23-01513-s001.zip › ijms-1514223-supplementary.pdf]

# Supplemental Materials

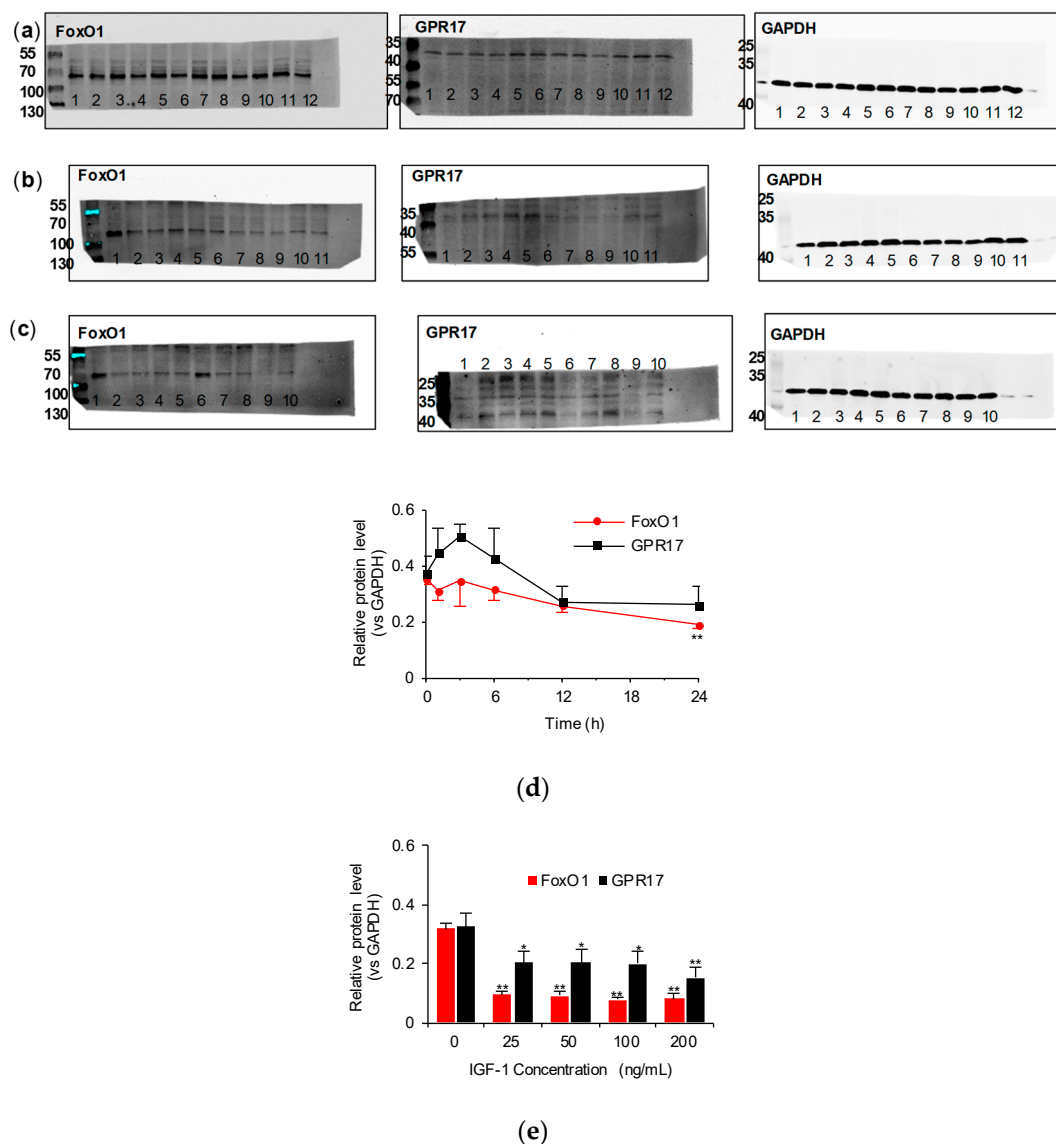

**Figure S1.** Whole Western blotting results in Figure 1. Each result in Figure 1 was collected from three separate experiments. Western blotting analyses of FoxO1 and GPR17 expression induced by 100 ng/mL IGF-1 within 24 h were presented from channels 1–12 in (a) and channels 6–11 in (b). Western blotting analyses of FoxO1 and GPR17 protein expression by different IGF-1 concentrations (0, 25, 50, 100, and 200 ng/mL) at 24 h were presented from channels 1–5 in (b) and channels 1–10 in (c). WB results in Figure 1b were selected from (a). The FoxO1 results in Figure 1b were selected from channels 7–12 of (a) FoxO1; the GAPDH results in Figure 1b were selected from channels 7–12 of (a) GAPDH. WB results in Figure 1e were selected from (b). The FoxO1 results in Figure 1e were selected from channels 1–5 of (b) FoxO1; the GAPDH results in Figure 1e were selected from channels 1–5 of (b) GAPDH. (d) Quantification of FoxO1 and GPR17 protein levels induced by 100 ng/mL of IGF-1 within 24 h; (e) quantification of FoxO1 and GPR17 protein expression induced by different concentrations of IGF-1 (0, 25, 50, 100, and 200 ng/mL) at 24 h. \*  $p < 0.05$  vs. 0 h or 0 ng/mL in the IGF-1 group; \*\*  $p < 0.01$  vs. 0 h or 0 ng/mL in the IGF-1 group.

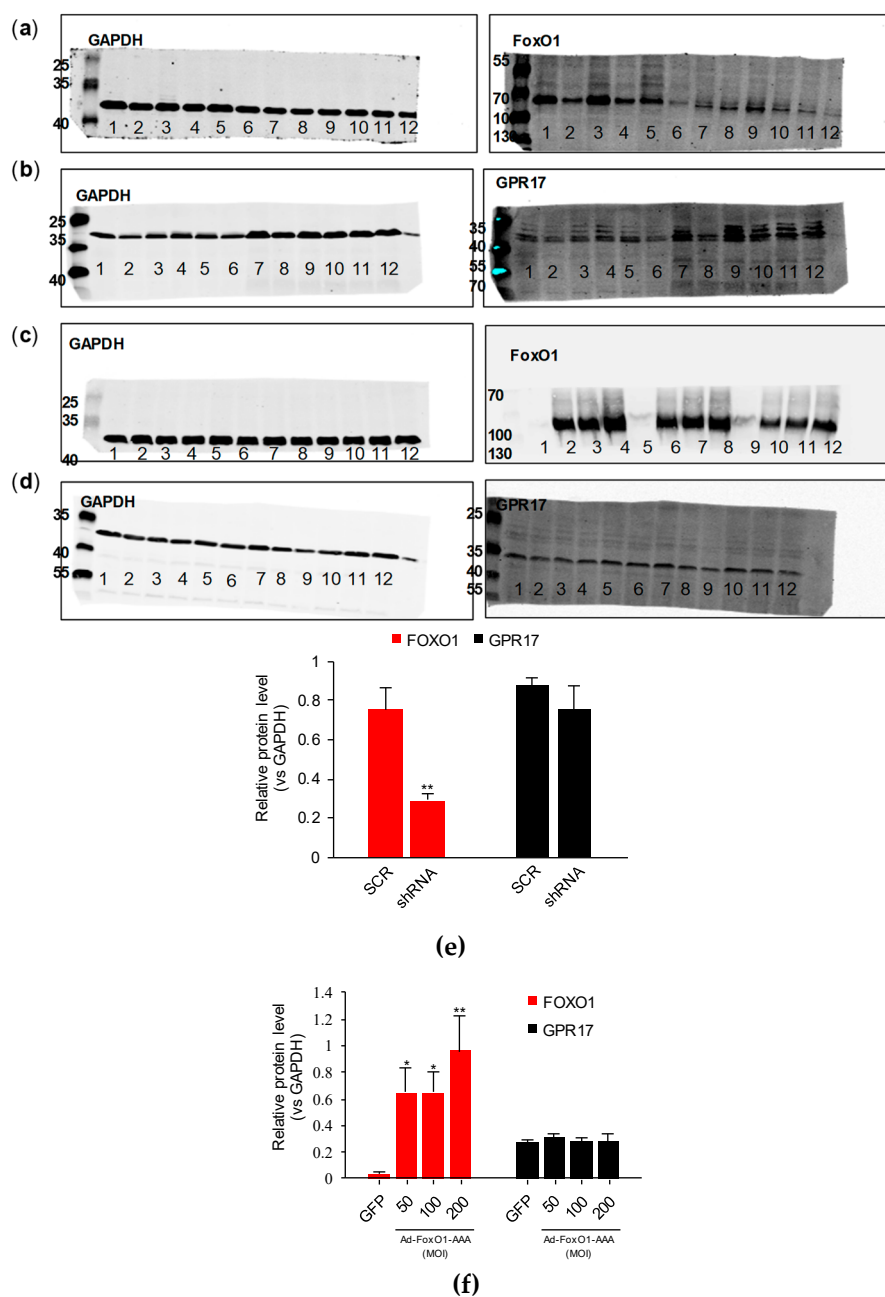

**Figure S2.** Whole Western blotting results in Figure 3. Each result in Figure 3 was collected from three separate experiments. Western blotting analyses of FoxO1 and GPR17 expression after FoxO1 silencing were presented from channels 1–6 in (a) and channels 1–6 in (b). Western blotting analyses of FoxO1 and GPR17 protein expression after FoxO1 overexpression were presented from channels 1–12 in (c) and channels 1–12 in (d). WB results in Figure 3b were selected from (a) and (b). The FoxO1 results in Figure 3b were selected from channels 1 and 2 of (a) FoxO1; the GAPDH results in Figure 3b associated with FoxO1 were selected from channels 1 and 2 of (a) GAPDH; WB results in Figure 3e were selected from (c) and (d). The FoxO1 results in Figure 3e were selected from channels 9–12 of (c) FoxO1; the GAPDH results associated with FoxO1 in Figure 3e were selected from channels 9–12 of (c) GAPDH. (e) Quantification of FoxO1 and GPR17 protein levels after FoxO1 silencing; (f) quantification of FoxO1 and GPR17 protein levels after FoxO1 overexpression. \*  $p < 0.05$  vs. control; \*\*  $p < 0.01$  vs. control.

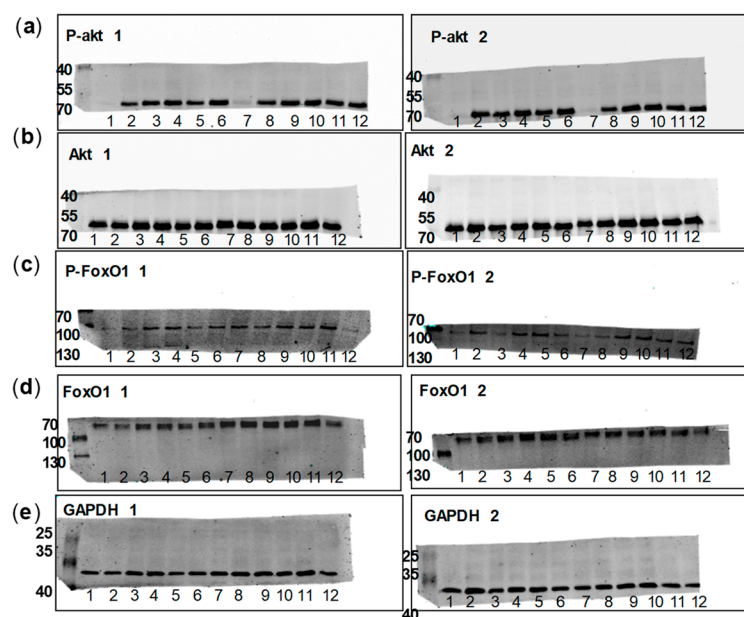

**Figure S3.** Whole Western blotting results in Figure 4a. Each result in Figure 4a was collected from three separate experiments. Western blotting analyses of P-Akt, Akt, pFoxO1, and FoxO1 protein expression with 100 ng/mL IGF-1 within 60 min were presented from channels 1–12 of the left panel and from channels 1–6 of the right panel. The P-Akt results in Figure 4a were selected from channels 1–6 in the left panel of (a) P-Akt; the Akt results in Figure 4a were selected from channels 1–6 in the left panel of (b) Akt; the pFoxO1 results in Figure 4a were selected from channels 1–6 in the left panel of (c) pFoxO1; the FoxO1 results in Figure 4a were selected from channels 1–6 in the left panel of (d) FoxO1; the GAPDH results in Figure 4a were selected from channels 1–6 in the left panel of (e) GAPDH.

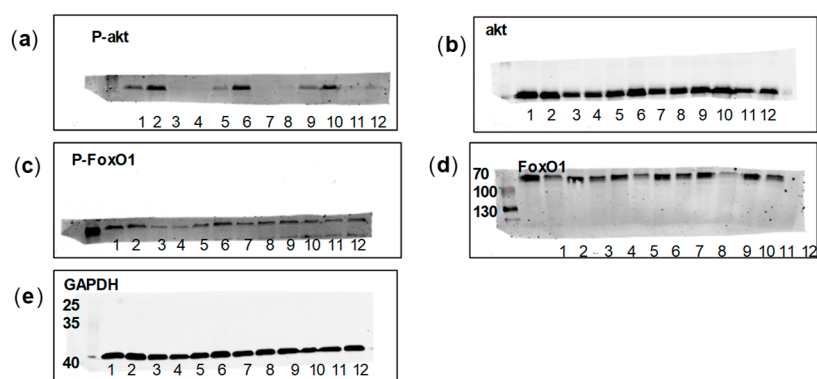

**Figure S4.** Whole Western blotting results in Figure 4e. Western blotting analyses of P-Akt, Akt, pFoxO1, and FoxO1 expression with or without IGF-1 and/or PI3K inhibitor LY294002 were presented in Figure 4e. The P-Akt results in Figure 4e were selected from channels 5–8 of (a); the Akt results in Figure 4e were selected from channels 5–8 of (b); the pFoxO1 results in Figure 4e were selected from channels 5–8 of (c); the FoxO1 results in Figure 4e were selected from channels 5–8 of (d); the GAPDH results in Figure 4e were selected from channels 5–8 of (e).

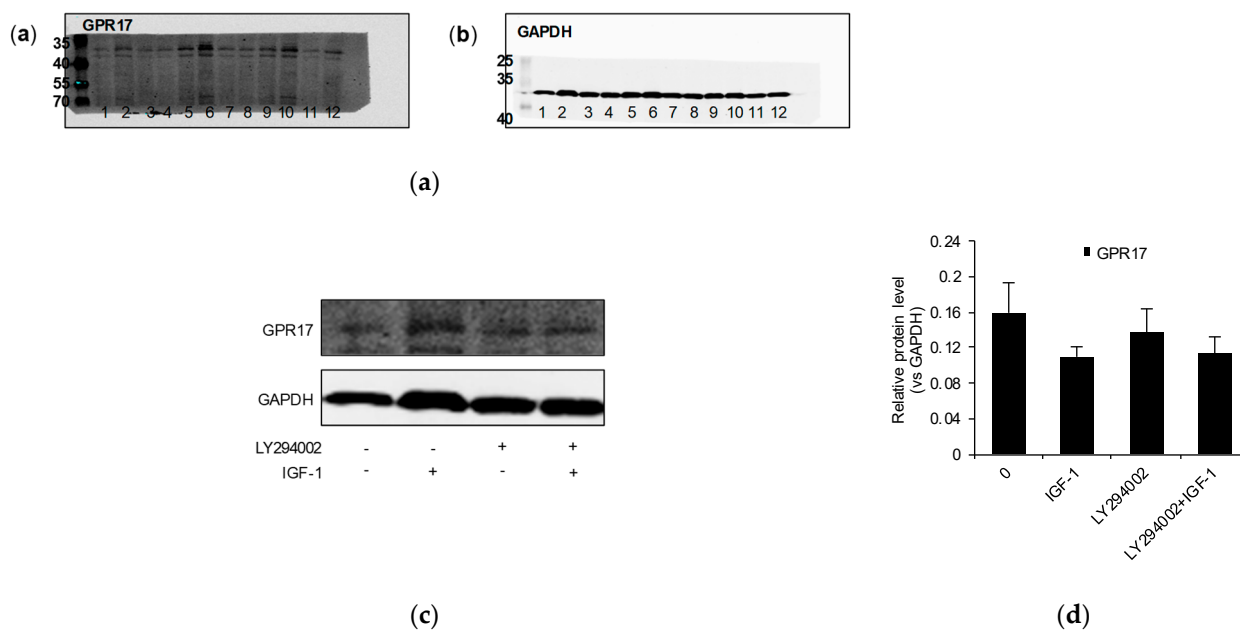

**Figure S5.** Whole Western blotting results in Figure 4h. Western blotting analyses of GPR17 expression with or without IGF-1 and/or PI3K inhibitor LY294002 were presented. The GPR17 results in Figure 4h were selected from channels 1–4 of (a); the GAPDH results in Figure 4h were selected from channels 1–4 of (b). (c) Western blot analysis of GPR17 expression in cells with or without IGF-1 and/or PI3K inhibitor (LY294002) treatment; (d) quantification of GPR17 levels in cells with or without IGF-1 and PI3K inhibitor (LY294002) treatment.
